# Supplementary material for: Effect of Vancomycin on the Gut Microbiome and Plasma Concentrations of Gut-Derived Uremic Solutes
Source: PubMed Central journal article supplement — Kidney Int Rep. 2021 May 19;6(8):2122–33. doi: 10.1016/j.ekir.2021.05.014 (PMC8343810; doi:10.1016/j.ekir.2021.05.014), 2021-05-19
Supplement: mmc1.pdf [file mmc1.pdf]

1 **Supplementary Figure S 1. Study design. Panel A:** Fifteen subjects with established ESRD  
2 receiving thrice weekly hemodialysis were randomly assigned, in a paired, single-blinded  
3 fashion, to receive either a 250 mg vancomycin or placebo capsule weekly. At 3 months,  
4 the subjects were crossed-over and either received placebo or vancomycin for another 3  
5 months. Pre-dialysis blood samples were collected weekly for one month and then  
6 monthly. Stool samples were collected at baseline and then monthly. **Panel B:** Summary of  
7 subject's samples included in each analysis.

8

9 **Supplementary Figure S2. Changes in concentration of solutes from 10 subjects ( 126**  
10 **samples) over the 12-week treatment periods.** Box and whisker plots are shown.

11

12 **Supplementary Figure S3. Vancomycin-related changes in relative abundance of**  
13 **genera.** Bar plot of the relative abundance of the top 10 most abundant genera at  
14 baseline and 4 weeks of antibiotics in each subjects. Samples rarefied to 1000.

15

16 **Supplementary Figure S4. IS recovery after 12 weeks vancomycin.** Black line is fitted  
17 mixed model.

18

19

1 **Suppl. Fig. S1**

2 **A**

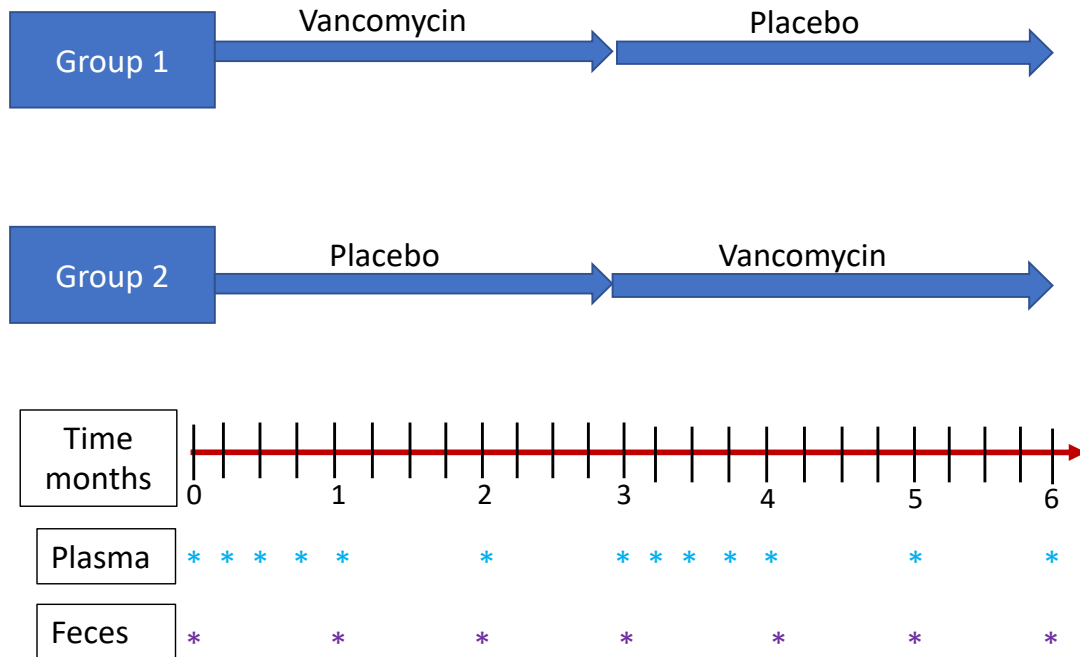

3 **B**

Baseline
  Receiving Vancomycin
  Receiving Placebo

S: Solutes  
 M: Microbiome  
**M: Samples included in DESeq2 analysis**  
 \*: stool samples included in the diversity analysis  
 †: stool samples included in the recovery analysis

| Subjects | Weeks 0 | 1 | 4 | 8   | 12  | 13   | 16 | 20  | 24  |
|----------|---------|---|---|-----|-----|------|----|-----|-----|
| RRA1     | SM*     | S | S | SM* | SM* | SM*† | S  | SM† | SM† |
| RRA2     | SM*     | S | S | SM* | SM* | S    | S  | S   | S   |
| RRA4     | SM*     | S | S | SM* | SM* | SM*† | S  | SM† | SM† |
| RRA5     | SM*     | S | S | S   | SM* | SM*† | S  | S   | S   |
| RRA8     | SM*     | S | S | SM* | SM* | SM*† | S  | SM† | SM† |
| RRZ1     | SM*     | S | S | SM* | SM* | SM*  | S  | SM* | SM* |
| RRZ3     | SM*     | S | S | SM* | SM* | S    | S  | SM* | SM* |
| RRZ4     | SM*     | S | S | SM* | S   | S    | S  | SM* | SM* |
| RRZ5     | SM*     | S | S | SM* | SM* | SM*  | S  | S   | SM* |
| RRZ6     | SM*     | S | S | SM* | SM* | SM*  | S  | SM* | SM* |

All SM samples were included in the solutes and microbiome correlation analysis

4  
5  
6  
7

1 **Suppl. Fig. S2**

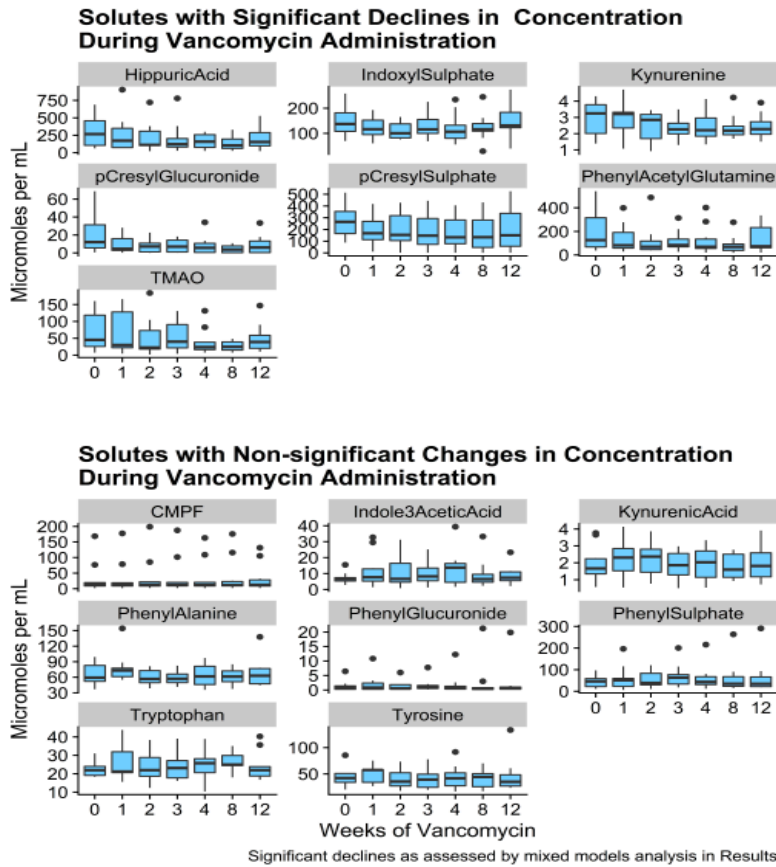

2

3 **Suppl. Fig. S3**

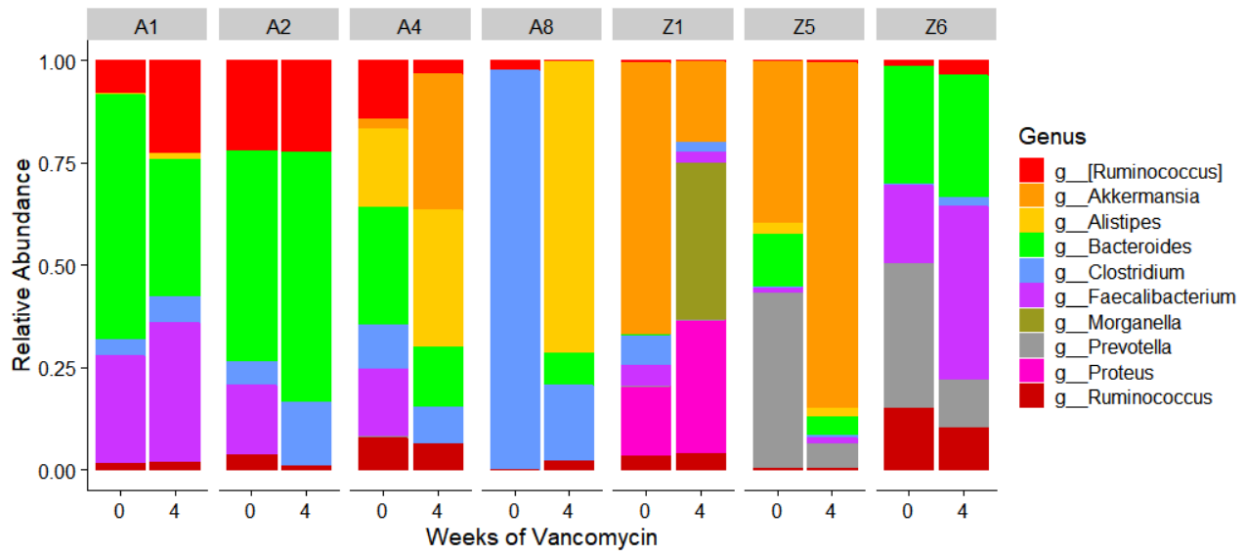

4

5

6 **Suppl. Fig. S4**

3

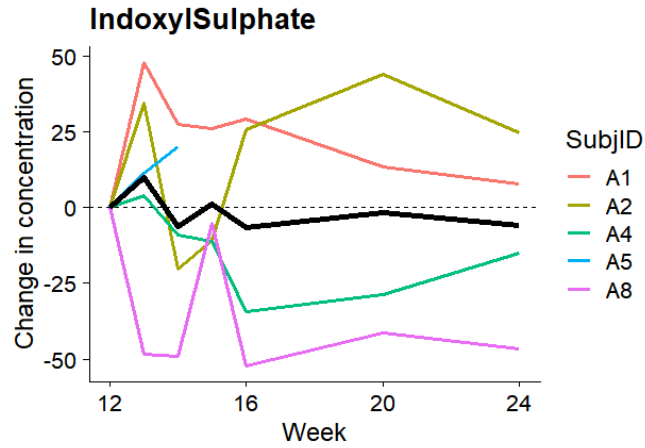

1  
2  
3

**Table S1: Vancomycin-related changes in relative abundance of genera**

| Genus                   | n | avwk0 | avwk4 | difference | SE.diff | Paired.t.pval |
|-------------------------|---|-------|-------|------------|---------|---------------|
| <b>Prevotella</b>       | 7 | 0.067 | 0.008 | -0.058     | 0.038   | 0.177         |
| <b>Clostridium</b>      | 7 | 0.075 | 0.033 | -0.041     | 0.05    | 0.439         |
| <b>Bacteroides</b>      | 7 | 0.130 | 0.094 | -0.037     | 0.021   | 0.134         |
| <b>Faecalibacterium</b> | 7 | 0.063 | 0.050 | -0.013     | 0.018   | 0.506         |
| <b>Ruminococcus</b>     | 7 | 0.023 | 0.019 | -0.003     | 0.009   | 0.742         |
| <b>Akkermansia</b>      | 7 | 0.094 | 0.095 | 0.001      | 0.056   | 0.985         |
| <b>[Ruminococcus]</b>   | 7 | 0.032 | 0.036 | 0.005      | 0.016   | 0.775         |
| <b>Proteus</b>          | 7 | 0.013 | 0.028 | 0.015      | 0.015   | 0.356         |
| <b>[Eubacterium]</b>    | 7 | 0.008 | 0.042 | 0.034      | 0.016   | 0.078         |
| <b>Alistipes</b>        | 7 | 0.013 | 0.080 | 0.067      | 0.049   | 0.224         |

4 avwk 0: average relative abundance at week 0  
 5 SE.diff: standard error difference  
 6 Paired.t.pval: p value from paired test comparing 0 and 4 weeks relative abundance.

7  
8
